# Supplementary material for: The International Study of Childhood Obesity, Lifestyle and the Environment (ISCOLE): design and methods
Source: PubMed Central journal article supplement (PMC3849927; doi:10.1186/1471-2458-13-900), 2013-09-30
Supplement: 1471-2458-13-900-S1.pdf [file 1471-2458-13-900-S1.pdf]

### C. HEALTH HISTORY OF CHILD

1. Birth Weight: \_\_\_\_\_kg OR \_\_\_\_\_lbs & \_\_\_\_\_oz      Birth Length: \_\_\_\_\_cm OR \_\_\_\_\_inches
2. Length of Pregnancy: \_\_\_\_\_weeks OR \_\_\_\_\_months
3. Did mother develop gestational diabetes during pregnancy with **THIS** child?  Yes      No
4. Fed breast milk?       Yes       No      If No, please skip to question 5.  
Age when **COMPLETELY** stopped being fed breast milk: \_\_\_\_\_months  
Age when **FIRST** fed formula: \_\_\_\_\_months
5. Age when **COMPLETELY** stopped drinking formula: \_\_\_\_\_months

### C. FAMILY DEMOGRAPHICS AND HEALTH

6. What is the marital status of the child's parents?
- Married  
 Divorced or separated  
 Never married  
 Widowed parent
7. How many people live in your household (at this address)? \_\_\_\_\_
- 7a.** Who lives with the child **at this address** (check all that apply)?
- |                                            |                                                  |
|--------------------------------------------|--------------------------------------------------|
| <input type="checkbox"/> Biological Mother | <input type="checkbox"/> Brother(s) or Sister(s) |
| <input type="checkbox"/> Biological Father | <input type="checkbox"/> Grandparent(s)          |
| <input type="checkbox"/> Adoptive Mother   | <input type="checkbox"/> Other Relative(s)       |
| <input type="checkbox"/> Adoptive Father   | <input type="checkbox"/> Friend(s)               |
| <input type="checkbox"/> Step Mother       | <input type="checkbox"/> Legal Guardian(s)       |
| <input type="checkbox"/> Step Father       | <input type="checkbox"/> OTHER                   |

8. What is the **COMBINED** annual income for your household (before taxes)?
- Less than \$10,000  
 \$10,000 - \$29,999  
 \$30,000 - \$49,999  
 \$50,000 - \$69,999  
 \$70,000 - \$89,999  
 \$90,000 - \$109,999  
 \$110,000 - \$139,999  
 \$140,000 and above

9. How many functioning motorized vehicles (car, truck, motorcycle, moped, etc.) are available for use at your house?

- 0
- 1
- 2
- 3
- 4
- 5 or more

10. How many television sets are in your household?

- 0
- 1
- 2
- 3
- 4
- 5 or more

11. What best describes your type of television service for the **primary** television in the house?

- No television
- Antenna only
- Basic cable
- Cable + premium channel(s)
- Satellite dish
- Other
- Don't know

12. What best describes your type of internet service?

- No internet access
- Dial-up modem
- DSL modem
- Cable modem
- Other
- Don't know

13. What is the **MOTHER'S** highest level of education completed?

- Less than high school
- Some high school
- High school diploma/GED
- Associate's degree or 1-3 years of college
- Bachelor's degree
- Graduate/professional degree

14. How many hours per week does the **MOTHER** work outside the home?

- None
- Less than 15 hours/week
- 15-35 hours per week
- Full time (36+ hours per week)

15. What is the **FATHER'S** highest level of education completed?

- Less than high school
- Some high school
- High school diploma/GED
- Associate's degree or 1-3 years of college
- Bachelor's degree
- Graduate/professional degree

16. How many hours per week does the **FATHER** work outside the home?

- None
- Less than 15 hours/week
- 15-35 hours per week
- Full time (36+ hours per week)

17. Is this child adopted?             Yes             No

18. Please answer the following questions with regard to the child's **BIOLOGICAL MOTHER**:

Current height: \_\_\_\_\_ cm **or** \_\_\_\_\_ feet and \_\_\_\_\_ inches      Current weight: \_\_\_\_\_ kg **or** \_\_\_\_\_ lbs

Current Age: \_\_\_\_\_ years

Age at child's birth: \_\_\_\_\_ years

Biological Mother's information cannot be estimated or is not known

19. Please answer the following questions with regard to the child's **BIOLOGICAL FATHER**:

Current height: \_\_\_\_\_ cm **or** \_\_\_\_\_ feet and \_\_\_\_\_ inches      Current weight: \_\_\_\_\_ kg **or** \_\_\_\_\_ lbs

Current age: \_\_\_\_\_ years

Biological Father's information cannot be estimated or is not known
